# Supplementary material
Source: MDPI journal article supplement (https://www.mdpi.com/2073-4395/13/3/724)
Supplement: s1 [file s1]

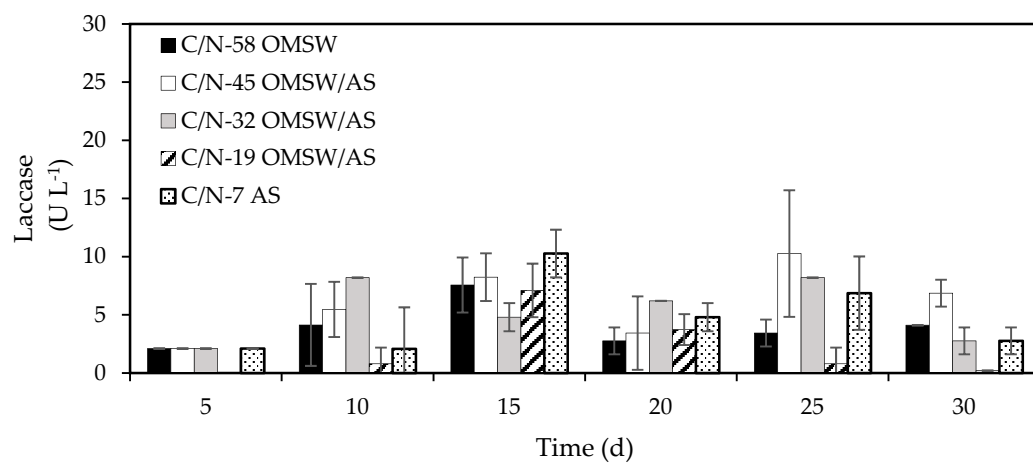

(a)

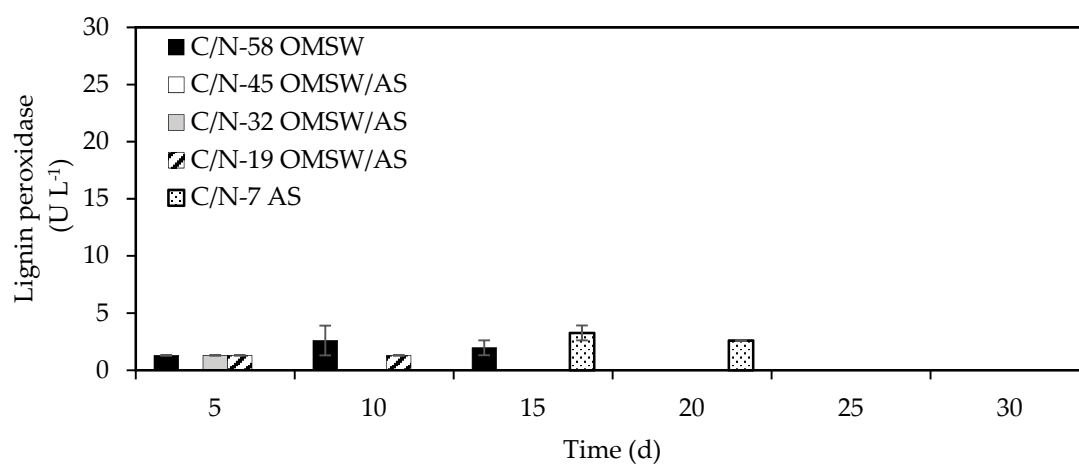

(b)

**Figure S1.** Enzymatic activities of Lac (a) and LiP (b) among all the pre-treatment.

**Table S1.** Enzymatic Activity.

| ANOVA: Two-Factor with Replication             |           |           |           |          |                |               |
|------------------------------------------------|-----------|-----------|-----------|----------|----------------|---------------|
| <b>Laccase enzyme</b>                          |           |           |           |          |                |               |
| <i>Source of variation</i>                     | <i>SS</i> | <i>df</i> | <i>Ms</i> | <i>F</i> | <i>P-value</i> | <i>F crit</i> |
| Sample                                         | 166,8     | 4         | 41,7      | 10,9     | 1,05E-06       | 2,5           |
| Columns                                        | 316,4     | 5         | 63,3      | 16,5     | 3,13E-10       | 2,4           |
| Interaction                                    | 256,1     | 20        | 12,8      | 3,3      | 1,55E-04       | 1,7           |
| Within                                         | 229,7     | 60        | 3,8       |          |                |               |
| Total                                          | 969,0     | 89        |           |          |                |               |
| <b>Manganese peroxidase enzyme</b>             |           |           |           |          |                |               |
| <i>Source of variation</i>                     | <i>SS</i> | <i>df</i> | <i>Ms</i> | <i>F</i> | <i>P-value</i> | <i>F crit</i> |
| Sample                                         | 212088,0  | 4         | 53022,0   | 206,7    | 2,36E-34       | 2,5           |
| Columns                                        | 169078,9  | 5         | 33815,8   | 131,8    | 5,06E-31       | 2,4           |
| Interaction                                    | 237693,8  | 20        | 11884,7   | 46,3     | 4,07E-29       | 1,7           |
| Within                                         | 15391,6   | 60        | 256,5     |          |                |               |
| Total                                          | 634252,2  | 89        |           |          |                |               |
| <b>Manganese independent peroxidase enzyme</b> |           |           |           |          |                |               |
| <i>Source of variation</i>                     | <i>SS</i> | <i>df</i> | <i>Ms</i> | <i>F</i> | <i>P-value</i> | <i>F crit</i> |
| Sample                                         | 14122,6   | 4         | 3530,7    | 61,8     | 1,33E-20       | 2,5           |
| Columns                                        | 5994,7    | 5         | 1198,9    | 21,0     | 4,59E-12       | 2,4           |
| Interaction                                    | 6079,5    | 20        | 304,0     | 5,3      | 2,31E-07       | 1,7           |
| Within                                         | 3428,1    | 60        | 57,1      |          |                |               |
| Total                                          | 29624,9   | 89        |           |          |                |               |

**Table S2.** MnP activity.

| ANOVA: Two-Factor with Replication                             |           |           |           |          |                |               |
|----------------------------------------------------------------|-----------|-----------|-----------|----------|----------------|---------------|
| <b>MnP activity in pretreatment at 171 g L<sup>-1</sup> TS</b> |           |           |           |          |                |               |
| <i>Source of variation</i>                                     | <i>SS</i> | <i>df</i> | <i>Ms</i> | <i>F</i> | <i>P-value</i> | <i>F crit</i> |
| Sample                                                         | 72875,8   | 1         | 72875,8   | 450,7    | 6,94E-11       | 4,7           |
| Columns                                                        | 14322,4   | 2         | 7161,2    | 44,3     | 2,88E-06       | 3,9           |
| Interaction                                                    | 16520,7   | 2         | 8260,4    | 51,1     | 1,35E-06       | 3,9           |
| Within                                                         | 1940,3    | 12        | 161,7     |          |                |               |
| Total                                                          | 105659,2  | 17        |           |          |                |               |
| <b>MnP activity in pretreatment at 75 g L<sup>-1</sup> TS</b>  |           |           |           |          |                |               |
| <i>Source of variation</i>                                     | <i>SS</i> | <i>df</i> | <i>Ms</i> | <i>F</i> | <i>P-value</i> | <i>F crit</i> |
| Sample                                                         | 4707,7    | 1         | 4707,7    | 7,7      | 1,66E-02       | 4,7           |
| Columns                                                        | 2122,9    | 2         | 1061,4    | 1,7      | 2,16E-01       | 3,9           |
| Interaction                                                    | 9434,4    | 2         | 4717,2    | 7,8      | 6,87E-03       | 3,9           |
| Within                                                         | 7294,6    | 12        | 607,9     |          |                |               |
| Total                                                          | 23559,6   | 17        |           |          |                |               |
| <b>MnP activity in pretreatment at 32 g L<sup>-1</sup> TS</b>  |           |           |           |          |                |               |
| <i>Source of variation</i>                                     | <i>SS</i> | <i>df</i> | <i>Ms</i> | <i>F</i> | <i>P-value</i> | <i>F crit</i> |
| Sample                                                         | 26293,7   | 1         | 26293,7   | 125,5    | 1,04E-07       | 4,7           |
| Columns                                                        | 48446,6   | 2         | 24223,3   | 115,6    | 1,44E-08       | 3,9           |
| Interaction                                                    | 50244,6   | 2         | 25122,3   | 119,9    | 1,17E-08       | 3,9           |
| Within                                                         | 2513,7    | 12        | 209,5     |          |                |               |
| Total                                                          | 127498,6  | 17        |           |          |                |               |
